# Supplementary material for: Tocochromanol Profiles in Chlorella sorokiniana, Nannochloropsis limnetica and Tetraselmis suecica Confirm the Presence of 11′-α-Tocomonoenol in Cultured Microalgae Independently of Species and Origin
Source: MDPI journal article supplement (doi:10.3390/foods11030396), 2022-01-29
Supplement: s1 [file s1]

**Tocochromanol profiles in *Chlorella sorokiniana*, *Nannochloropsis limnetica* and *Tetraselmis suecica* confirm the presence of 11'- $\alpha$ -tocomonoenol in cultured microalgae independently of species and origin.**

Alexander Montoya-Arroyo, Katja Lehnert, Alejandra Muñoz-González, Ulrike Schmid-Staiger, Walter Vetter and Jan Frank \*

\* Correspondence: Department of Food Biofunctionality (140b), Institute of Nutritional Sciences, University of Hohenheim. Garbenstrasse 28, 70599 Stuttgart, Germany. jan.frank@nutres.de, Tel. +49-711-459 24410.

**Supplementary Material:**

**Table S1.** Fragmentation patterns for commercial standards of tocopherols and tocotrienols using LC-MS<sup>n</sup>.

| Sample       | Congener              | RT<br>(min) | Identified Ions                                                                |
|--------------|-----------------------|-------------|--------------------------------------------------------------------------------|
| Tocotrienols | $\delta$ -tocotrienol | 9.82        | $m/z$ 397.3102 ( $C_{27}H_{41}O_2$ ; $\Delta$ ppm = 0.2) ([M+H] <sup>+</sup> ) |
|              |                       |             | $m/z$ 177.0910 ( $C_{11}H_{13}O_2$ ; $\Delta$ ppm = -0.2)                      |
|              |                       |             | $m/z$ 137.0596 ( $C_8H_9O_2$ ; $\Delta$ ppm = -1.0)                            |
|              | $\beta$ -tocotrienol  | 10.90       | $m/z$ 411.3259 ( $C_{28}H_{43}O_2$ ; $\Delta$ ppm = 0.3) ([M+H] <sup>+</sup> ) |
|              |                       |             | $m/z$ 191.1067 ( $C_{12}H_{15}O_2$ ; $\Delta$ ppm = 0.0)                       |
|              |                       |             | $m/z$ 151.0754 ( $C_9H_{11}O_2$ ; $\Delta$ ppm = 0.2)                          |
|              | $\gamma$ -tocotrienol | 11.40       | $m/z$ 411.3260 ( $C_{28}H_{43}O_2$ ; $\Delta$ ppm = 0.5) ([M+H] <sup>+</sup> ) |
|              |                       |             | $m/z$ 191.1067 ( $C_{12}H_{15}O_2$ ; $\Delta$ ppm = 0.2)                       |
|              |                       |             | $m/z$ 151.0754 ( $C_9H_{11}O_2$ ; $\Delta$ ppm = 0.2)                          |
|              | $\alpha$ -tocotrienol | 12.32       | $m/z$ 425.3416 ( $C_{29}H_{45}O_2$ ; $\Delta$ ppm = 0.3) ([M+H] <sup>+</sup> ) |
|              |                       |             | $m/z$ 205.1233 ( $C_{13}H_{17}O_2$ ; $\Delta$ ppm = 0.2)                       |
|              |                       |             | $m/z$ 165.0911 ( $C_{10}H_{13}O_2$ ; $\Delta$ ppm = 0.0)                       |
| Tocopherols  | $\delta$ -tocopherol  | 12.96       | $m/z$ 403.3572 ( $C_{27}H_{47}O_2$ ; $\Delta$ ppm = 0.5) ([M+H] <sup>+</sup> ) |
|              |                       |             | $m/z$ 177.0910 ( $C_{11}H_{13}O_2$ ; $\Delta$ ppm = 0.0)                       |
|              |                       |             | $m/z$ 137.0597 ( $C_8H_9O_2$ ; $\Delta$ ppm = 0.0)                             |
|              | $\beta$ -tocopherol   | 13.96       | $m/z$ 417.3727 ( $C_{28}H_{49}O_2$ ; $\Delta$ ppm = 0.1) ([M+H] <sup>+</sup> ) |
|              |                       |             | $m/z$ 191.1065 ( $C_{12}H_{15}O_2$ ; $\Delta$ ppm = -0.6)                      |
|              |                       |             | $m/z$ 151.0754 ( $C_9H_{11}O_2$ ; $\Delta$ ppm = 0.2)                          |
|              | $\gamma$ -tocopherol  | 14.36       | $m/z$ 417.3730 ( $C_{28}H_{49}O_2$ ; $\Delta$ ppm = 0.7) ([M+H] <sup>+</sup> ) |
|              |                       |             | $m/z$ 191.1065 ( $C_{12}H_{15}O_2$ ; $\Delta$ ppm = -0.6)                      |
|              |                       |             | $m/z$ 151.0754 ( $C_9H_{11}O_2$ ; $\Delta$ ppm = 0.2)                          |
|              | $\alpha$ -tocopherol  | 15.21       | $m/z$ 431.3885 ( $C_{29}H_{51}O_2$ ; $\Delta$ ppm = 0.4) ([M+H] <sup>+</sup> ) |
|              |                       |             | $m/z$ 205.1223 ( $C_{13}H_{17}O_2$ ; $\Delta$ ppm = -0.3)                      |
|              |                       |             | $m/z$ 165.0910 ( $C_{10}H_{13}O_2$ ; $\Delta$ ppm = 0.1)                       |

**Table S2.** LC-MS<sup>n</sup> fragmentation patterns of tocotrienols in *Chlorella sorokiniana*, *Nannochloropsis limnetica* and *Tetraselmis suecica*.

| Sample                | Congener              | RT<br>(min) | Identified Ions                                                                 |
|-----------------------|-----------------------|-------------|---------------------------------------------------------------------------------|
| <i>C. sorokiniana</i> | $\delta$ -tocotrienol | 9.78        | $m/z$ 397.3078 ( $C_{27}H_{41}O_2$ ; $\Delta$ ppm = -5.9) ([M+H] <sup>+</sup> ) |
|                       |                       |             | $m/z$ 177.0911 ( $C_{11}H_{13}O_2$ ; $\Delta$ ppm = 0.6)                        |
|                       |                       |             | $m/z$ 137.0597 ( $C_8H_9O_2$ ; $\Delta$ ppm = -0.1)                             |
|                       | $\beta$ -tocotrienol  | 10.80       | $m/z$ 411.3259 ( $C_{28}H_{43}O_2$ ; $\Delta$ ppm = 0.3) ([M+H] <sup>+</sup> )  |
|                       |                       |             | $m/z$ 191.1066 ( $C_{12}H_{15}O_2$ ; $\Delta$ ppm = -0.3)                       |
|                       |                       |             | $m/z$ 151.0754 ( $C_9H_{11}O_2$ ; $\Delta$ ppm = 0.0)                           |
|                       | $\gamma$ -tocotrienol | 11.43       | $m/z$ 411.3257 ( $C_{28}H_{43}O_2$ ; $\Delta$ ppm = -0.1) ([M+H] <sup>+</sup> ) |
|                       |                       |             | $m/z$ 191.1430 ( $C_{12}H_{15}O_2$ ; $\Delta$ ppm = -0.4)                       |
|                       |                       |             | $m/z$ 151.0754 ( $C_9H_{11}O_2$ ; $\Delta$ ppm = 0.2)                           |
| <i>N. limnetica</i>   | $\delta$ -tocotrienol | 9.72        | $m/z$ 425.3409 ( $C_{29}H_{45}O_2$ ; $\Delta$ ppm = -2.4) ([M+H] <sup>+</sup> ) |
|                       |                       |             | $m/z$ 205.1223 ( $C_{13}H_{17}O_2$ ; $\Delta$ ppm = -2.8)                       |
|                       |                       |             | $m/z$ 165.0910 ( $C_{10}H_{13}O_2$ ; $\Delta$ ppm = -3.2)                       |
|                       | $\beta$ -tocotrienol  | 10.81       | $m/z$ 397.3095 ( $C_{27}H_{41}O_2$ ; $\Delta$ ppm = -1.6) ([M+H] <sup>+</sup> ) |
|                       |                       |             | $m/z$ 177.0911 ( $C_{11}H_{13}O_2$ ; $\Delta$ ppm = 0.3)                        |
|                       |                       |             | $m/z$ 137.0597 ( $C_8H_9O_2$ ; $\Delta$ ppm = 0.1)                              |
|                       | $\gamma$ -tocotrienol | 11.43       | $m/z$ 411.3260 ( $C_{28}H_{43}O_2$ ; $\Delta$ ppm = -0.8) ([M+H] <sup>+</sup> ) |
|                       |                       |             | $m/z$ 191.1067 ( $C_{12}H_{15}O_2$ ; $\Delta$ ppm = -2.8)                       |
|                       |                       |             | $m/z$ 151.0754 ( $C_9H_{11}O_2$ ; $\Delta$ ppm = -3.6)                          |
| <i>T. suecica</i>     | $\delta$ -tocotrienol | 9.72        | $m/z$ 411.3259 ( $C_{28}H_{43}O_2$ ; $\Delta$ ppm = 0.4) ([M+H] <sup>+</sup> )  |
|                       |                       |             | $m/z$ 191.1067 ( $C_{12}H_{15}O_2$ ; $\Delta$ ppm = 0.1)                        |
|                       |                       |             | $m/z$ 151.0754 ( $C_9H_{11}O_2$ ; $\Delta$ ppm = 0.0)                           |
|                       | $\alpha$ -tocotrienol | 12.30       | $m/z$ 425.3415 ( $C_{29}H_{45}O_2$ ; $\Delta$ ppm = 0.3) ([M+H] <sup>+</sup> )  |
|                       |                       |             | $m/z$ 205.1225 ( $C_{13}H_{17}O_2$ ; $\Delta$ ppm = 0.7)                        |
|                       |                       |             | $m/z$ 165.0911 ( $C_{10}H_{13}O_2$ ; $\Delta$ ppm = 0.3)                        |
|                       | $\delta$ -tocotrienol | 9.72        | $m/z$ 397.3095 ( $C_{27}H_{41}O_2$ ; $\Delta$ ppm = -1.6) ([M+H] <sup>+</sup> ) |
|                       |                       |             | $m/z$ 177.0910 ( $C_{11}H_{13}O_2$ ; $\Delta$ ppm = 0.1)                        |
|                       |                       |             | $m/z$ 137.0597 ( $C_8H_9O_2$ ; $\Delta$ ppm = -0.2)                             |
| <i>T. suecica</i>     | $\beta$ -tocotrienol  | 10.84       | $m/z$ 411.3249 ( $C_{28}H_{43}O_2$ ; $\Delta$ ppm = -2.0) ([M+H] <sup>+</sup> ) |
|                       |                       |             | $m/z$ 191.1065 ( $C_{12}H_{15}O_2$ ; $\Delta$ ppm = -0.8)                       |
|                       |                       |             | $m/z$ 151.0733 ( $C_9H_{11}O_2$ ; $\Delta$ ppm = -0.6)                          |
|                       | $\gamma$ -tocotrienol | 11.43       | $m/z$ 411.3257 ( $C_{28}H_{43}O_2$ ; $\Delta$ ppm = 0.0) ([M+H] <sup>+</sup> )  |
|                       |                       |             | $m/z$ 191.1067 ( $C_{12}H_{15}O_2$ ; $\Delta$ ppm = -0.3)                       |
|                       |                       |             | $m/z$ 151.0753 ( $C_9H_{11}O_2$ ; $\Delta$ ppm = -0.4)                          |
|                       | $\alpha$ -tocotrienol | 12.33       | $m/z$ 425.3400 ( $C_{29}H_{45}O_2$ ; $\Delta$ ppm = -3.3) ([M+H] <sup>+</sup> ) |
|                       |                       |             | $m/z$ 205.1227 ( $C_{13}H_{17}O_2$ ; $\Delta$ ppm = -0.2)                       |
|                       |                       |             | $m/z$ 165.0910 ( $C_{10}H_{13}O_2$ ; $\Delta$ ppm = -0.2)                       |

**Table S3.** Relative fatty acid content (percentage of total fatty acids, (g/100 g FA)) in *Chlorella sorokiniana*, *Nannochloropsis limnetica* and *Tetraselmis suecica* determined by GC-MS as FAME (n=3). Fatty acids not sharing a superscript letter are significantly different (ANOVA,  $\alpha=0.05$ ).

| Fatty Acid       | Relative fatty acid content (g/100 g FA) |                                  |                            |
|------------------|------------------------------------------|----------------------------------|----------------------------|
|                  | <i>Chlorella sorokiniana</i>             | <i>Nannochloropsis limnetica</i> | <i>Tetraselmis suecica</i> |
| 10:0             | nd                                       | nd                               | 0.04 ± 0.00                |
| 12:0             | nd                                       | nd                               | 0.09 ± 0.00                |
| 14:0             | 0.34 ± 0.01 <sup>c</sup>                 | 0.47 ± 0.02 <sup>b</sup>         | 0.64 ± 0.00 <sup>a</sup>   |
| <i>i</i> 15:0    | 0.13 ± 0.00 <sup>b</sup>                 | 0.18 ± 0.01 <sup>a</sup>         | nd                         |
| <i>a</i> 15:0    | 0.01 ± 0.00                              | nd                               | nd                         |
| 15:0             | 0.04 ± 0.00 <sup>b</sup>                 | 0.06 ± 0.00 <sup>a</sup>         | 0.03 ± 0.00 <sup>b</sup>   |
| 16:0             | 15.4 ± 0.12 <sup>c</sup>                 | 23.8 ± 0.16 <sup>b</sup>         | 24.6 ± 0.25 <sup>a</sup>   |
| 16:1             | 5.4 ± 0.1 <sup>a</sup>                   | 3.1 ± 0.13 <sup>b</sup>          | 1.3 ± 0.05 <sup>c</sup>    |
| 16:1 <i>n</i> -7 | 1.3 ± 0.05 <sup>c</sup>                  | 8.4 ± 0.06 <sup>a</sup>          | 2.9 ± 0.04 <sup>b</sup>    |
| 16:2             | 27.3 ± 0.45 <sup>a</sup>                 | 17.6 ± 0.63 <sup>b</sup>         | nd                         |
| 16:3 <i>n</i> -3 | 7.0 ± 0.15 <sup>a</sup>                  | 6.1 ± 0.32 <sup>a</sup>          | 1.4 ± 0.02 <sup>b</sup>    |
| 16:4             | nd                                       | nd                               | 8.7 ± 0.05                 |
| <i>i</i> 17:0    | 0.37 ± 0.02 <sup>b</sup>                 | 0.69 ± 0.05 <sup>a</sup>         | nd                         |
| 17:0             | 0.06 ± 0.01 <sup>b</sup>                 | 0.09 ± 0.01 <sup>a</sup>         | nd                         |
| 17:1             | 0.19 ± 0.02                              | nd                               | nd                         |
| 17:2             | 0.20 ± 0.02                              | nd                               | nd                         |
| 18:0             | 0.42 ± 0.02 <sup>b</sup>                 | 0.43 ± 0.04 <sup>b</sup>         | 0.63 ± 0.02 <sup>a</sup>   |
| 18:1             | 0.49 ± 0.02 <sup>c</sup>                 | 1.2 ± 0.12 <sup>b</sup>          | 5.5 ± 0.09 <sup>a</sup>    |
| 18:1 <i>n</i> -9 | 5.4 ± 0.10 <sup>b</sup>                  | 6.0 ± 0.22 <sup>b</sup>          | 10.8 ± 0.03 <sup>a</sup>   |
| 18:2             | 0.04 ± 0.01                              | nd                               | nd                         |
| 18:2 <i>n</i> -6 | 26.0 ± 0.13 <sup>a</sup>                 | 26.4 ± 0.05 <sup>b</sup>         | 12.7 ± 0.10 <sup>c</sup>   |
| 18:3 <i>n</i> -3 | 10.0 ± 0.00 <sup>b</sup>                 | 5.6 ± 0.19 <sup>c</sup>          | 20.3 ± 0.53 <sup>a</sup>   |
| 18:3 <i>n</i> -6 | nd                                       | nd                               | 0.73 ± 0.03                |
| 18:4             | nd                                       | nd                               | 4.3 ± 0.06                 |
| 20:4 <i>n</i> -6 | nd                                       | nd                               | 2.1 ± 0.07                 |
| 20:5 <i>n</i> -3 | nd                                       | nd                               | 3.3 ± 0.11                 |
| 24:0             | 0.02 ± 0.00                              | nd                               | nd                         |
| PUFA <i>n</i> -3 | nd                                       | nd                               | 0.16 ± 0.02                |

**nd:** not detected in the sample.

**a:** anti-*iso* isomer

**i:** *iso* isomer

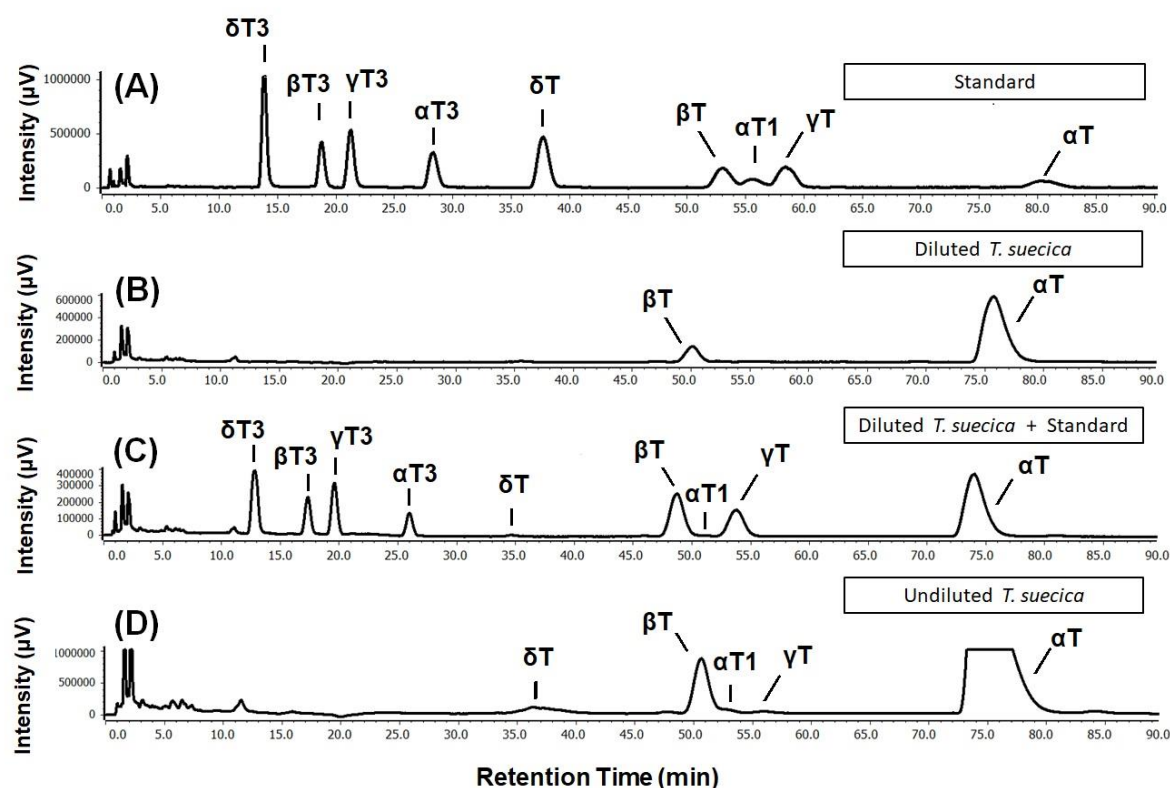

**Figure S1.** Representative chromatogram for tocopherol identification by HPLC-FLD. Standard mix of tocotrienols, tocopherols (T), and 11'-α-tocomonoenol (αT1) (A); *Tetraselmis suecica* (sample diluted 1:5 vol/vol with ethanol) (B); *Tetraselmis suecica* (sample diluted 1:5 vol/vol with ethanol) + standard mix (C); undiluted sample of *Tetraselmis suecica* (D).
